# Supplementary material for: Optimizing the high-field relaxivity by self-assembling of macrocyclic Gd(iii) complexes
Source: Royal Society of Chemistry journal article supplement (doi:10.1039/c4dt02971b), 2014-11-07

PREPRINT

## Electronic Supplementary Information to

### Optimizing the high-field relaxivity by self-assembling of macrocyclic Gd(III) complexes

Dale Lawson,<sup>a,c</sup> Alessandro Barge,<sup>b</sup> Enzo Terreno,<sup>a</sup> David Parker,<sup>c</sup> Silvio Aime,<sup>a</sup> Mauro Botta<sup>d\*</sup>

<sup>a</sup> *Department of Molecular Biotechnology and Health Sciences, Molecular Imaging Center, University of Torino, Via Nizza, 52, 10126, Torino, Italy.*

<sup>b</sup> *Department of Drug Science and Technology, University of Torino, Via Giuria 9, 10125 Torino, Italy.*

<sup>c</sup> *Department of Chemistry, Durham University, South Road, Durham DH1 3LE, UK*

<sup>d</sup> *Dipartimento di Scienze e Innovazione Tecnologica, Università del Piemonte Orientale, Viale T. Michel 11, 15121, Alessandria, Italy Tel: +39 0131360253; E-mail: [mauro.botta@unipmn.it](mailto:mauro.botta@unipmn.it)*

### Equations used for the analysis of NMRD data

The measured longitudinal proton relaxation rate,  $R_1^{obs}$  is the sum of a paramagnetic and a diamagnetic contribution as expressed in Eq. [1], where  $r_1$  is the proton relaxivity:

$$R_1^{obs} = R_1^d + R_1^p = R_1^d + r_1 [Gd^{3+}] \quad [1]$$

The relaxivity can be divided into an inner and an outer sphere term as follows:

$$r_1 = r_{1is} + r_{1ss} + r_{1os} \quad [2]$$

The inner sphere term is given in Eq. [3], where  $q$  is the number of inner sphere water molecules.<sup>1</sup>

$$r_{is} = \frac{1}{1000} \times \frac{q}{55.55} \times \frac{1}{T_{1m}^H + \tau_m} \quad [3]$$

The longitudinal relaxation rate of inner sphere protons,  $1/T_{1m}^H$  is expressed by Eq. [4]:

$$\frac{1}{T_{1m}^H} = \frac{2}{15} \left( \frac{\mu_0}{4\pi} \right)^2 \frac{\gamma_I^2 g^2 \mu_B^2}{r_{GdH}^6} S(S+1) \left[ \frac{3\tau_{d1}}{1 + \omega_I^2 \tau_{d1}^2} + \frac{7\tau_{d2}}{1 + \omega_S^2 \tau_{d2}^2} \right] \quad [4]$$

where  $r_{GdH}$  is the effective distance between the electron charge and the  $^1H$  nucleus,  $\omega_I$  is the proton resonance frequency and  $\omega_S$  is the Larmor frequency of the Gd(III) electron spin.

$$\frac{1}{\tau_{di}} = \frac{1}{\tau_m} + \frac{1}{\tau_{RH}} + \frac{1}{T_{ie}} \quad i = 1, 2 \quad [5]$$

The longitudinal and transverse electronic relaxation rates,  $1/T_{1e}$  and  $1/T_{2e}$  are expressed by Eq. [7]-[8], where  $\tau_v$  is the electronic correlation time for the modulation of the zero-field-splitting interaction,  $E_v$  the corresponding activation energy and  $\Delta^2$  is the mean square zero-field-splitting energy. We assumed a simple exponential dependence of  $\tau_v$  versus  $1/T$  as written in Eq. [9].

$$\left( \frac{1}{T_{1e}} \right)^{ZFS} = \frac{1}{25} \Delta^2 \tau_v \{ 4S(S+1) - 3 \} \left( \frac{1}{1 + \omega_S^2 \tau_v^2} + \frac{4}{1 + 4\omega_S^2 \tau_v^2} \right) \quad [7]$$

$$\left(\frac{1}{T_{2e}}\right)^{ZFS} = \Delta^2 \tau_v \left( \frac{5.26}{1 + 0.372 \omega_S^2 \tau_v^2} + \frac{7.18}{1 + 1.24 \omega_S \tau_v} \right) \quad [8]$$

$$\tau_v = \tau_v^{298} \exp \left\{ \frac{E_v}{R} \left( \frac{1}{T} - \frac{1}{298.15} \right) \right\} \quad [9]$$

The outer-sphere contribution can be described by Eq. [10] where  $N_A$  is the Avogadro constant, and  $J_{os}$  is its associated spectral density function.<sup>2,3</sup>

$$r_{1os} = \frac{32 N_A \pi}{405} \left( \frac{\mu_0}{4\pi} \right)^2 \frac{\hbar^2 \gamma_S^2 \gamma_I^2}{a_{GdH} D_{GdH}} S(S+1) [3J_{os}(\omega_I; T_{1e}) + 7J_{os}(\omega_S; T_{2e})] \quad [10]$$

$$J^{OS}(\omega, T_{je}) = \text{Re} \left[ \frac{1 + \frac{1}{4} \left( i\omega \tau_{GdH} + \frac{\tau_{GdH}}{T_{je}} \right)^{1/2}}{1 + \left( i\omega \tau_{GdH} + \frac{\tau_{GdH}}{T_{je}} \right)^{1/2} + \frac{4}{9} \left( i\omega \tau_{GdH} + \frac{\tau_{GdH}}{T_{je}} \right) + \frac{1}{9} \left( i\omega \tau_{GdH} + \frac{\tau_{GdH}}{T_{je}} \right)^{3/2}} \right] \quad [11]$$

where  $j = 1, 2$ ,  $\tau_{GdH} = \frac{a_{GdH}^2}{D_{GdH}}$ .

The same set of equations [3-5] can be used to evaluate the contribution to  $r_1$  of the water molecules in the second coordination sphere,  $r_{1ss}$ .<sup>4,5</sup>

- 1) Z. Luz, S. Meiboom, *J. Chem. Phys.* **1964**, 40, 2686.
- 2) J. H. Freed, *J. Chem. Phys.* **1978**, 68, 4034.
- 3) S. H. Koenig, R. D. Brown III, *Prog. Nucl. Magn. Reson. Spectrosc.* **1991**, 22, 487.
- 4) M. Botta, *Eur. J. Inorg. Chem.* **2000**, 399
- 5) K. D. Verma, A. Forgács, H. Uh, M. Beyerlein, M. E. Maier, S. Petoud, M. Botta, N. K. Logothetis *Chem. Eur. J.* **2013**, 19, 18011

### Equations used for the analysis of $^{17}\text{O}$ NMR data

From the measured  $^{17}\text{O}$  NMR transversal relaxation rates and angular frequencies of the paramagnetic solutions,  $1/T_1$ ,  $1/T_2$  and  $\omega$ , and of the acidified water reference,  $1/T_{1A}$ ,  $1/T_{2A}$  and  $\omega_A$ , one can calculate the reduced relaxation rates,  $1/T_{1r}$ ,  $1/T_{2r}$  and reduced chemical shifts (Eq. [1] - [2]), where  $1/T_{2m}$  is the relaxation rate of the bound water and  $\Delta\omega_m$  is the chemical shift difference between bound and bulk water,  $\tau_m$  is the mean residence time or the inverse of the water exchange rate  $k_{ex}$  and  $P_m$  is the mole fraction of the bound water.<sup>1,2</sup>

$$\frac{1}{T_{2r}} = \frac{1}{P_m} \left[ \frac{1}{T_2} - \frac{1}{T_{2A}} \right] = \frac{1}{\tau_m} \frac{T_{2m}^{-2} + \tau_m^{-1} T_{2m}^{-1} + \Delta\omega_m^2}{(\tau_m^{-1} + T_{2m}^{-1})^2 + \Delta\omega_m^2} + \frac{1}{T_{2OS}} \quad [1]$$

$$\Delta\omega_r = \frac{1}{P_m} (\omega - \omega_A) = \frac{\Delta\omega_m}{(1 + \tau_m T_{2m}^{-1})^2 + \tau_m^2 \Delta\omega_m^2} + \Delta\omega_{os} \quad [2]$$

Previous studies have shown that outer sphere contributions to the  $^{17}\text{O}$  relaxation rates are negligible.<sup>3</sup>

Equation [1] can be further simplified:

$$\frac{1}{T_{2r}} = \frac{1}{T_{2m} + \tau_m} \quad [3]$$

The exchange rate is supposed to assume the Eyring equation. In Eq. [4]  $\Delta S^\ddagger$  and  $\Delta H^\ddagger$  are the entropy and enthalpy of activation for the water exchange process, and  $k_{ex}^{298}$  is the exchange rate at 298.15 K.

$$\frac{1}{\tau_m} = k_{ex} = \frac{k_B T}{h} \exp \left\{ \frac{\Delta S^\ddagger}{R} - \frac{\Delta H^\ddagger}{RT} \right\} = \frac{k_{ex}^{298} T}{298.15} \exp \left\{ \frac{\Delta H^\ddagger}{R} \left( \frac{1}{298.15} - \frac{1}{T} \right) \right\} \quad [4]$$

In the transverse relaxation the scalar contribution,  $1/T_{2sc}$ , is the most important, Eq. [5].  $1/\tau_{s1}$  is the sum of the exchange rate constant and the electron spin relaxation rate.

$$\frac{1}{T_{2m}} \cong \frac{1}{T_{2SC}} = \frac{S(S+1)}{3} \left( \frac{A}{h} \right)^2 \tau_{s1} \quad [5]$$

$$\frac{1}{\tau_{s1}} = \frac{1}{\tau_m} + \frac{1}{T_{1e}} \quad [6]$$

- 1) Swift, T. J.; Connick, R. E. *J. Chem. Phys.* **1962**, 37, 307.
- 2) Zimmermann, J. R.; Brittin, W. E. *J. Phys. Chem.* **1957**, 61, 1328.
- 3) Micskei, K.; Helm, L.; Brücher, E.; Merbach, A. E. *Inorg. Chem.* **1993**, 32, 3844.

### Binding Interaction of the two Gd(III) complexes

The binding parameters involved in the non-covalent interaction between two paramagnetic complexes,  $\text{GdL}^1$  and  $\text{GdL}^2$ , can be determined by relaxometry using the well-consolidated Proton Relaxation Enhancement (PRE) method.

In a solution containing the two interacting systems, the observed water protons longitudinal relaxation rate is expressed by the following relationship:

$$R_1^{\text{obs}} = r_1^{\text{GdL}^1} [\text{GdL}^1] + r_1^{\text{GdL}^2} [\text{GdL}^2] + r_1^{\text{Gd}_2\text{L}^1\text{L}^2} [\text{Gd}_2\text{L}^1\text{L}^2] + R_1^{\text{dia}} \quad [1]$$

where the  $r_i$  terms refer to the relaxivities, normalized to 1 mM, of the different paramagnetic species present in the solution. Note that  $r_1^{\text{Gd}_2\text{L}^1\text{L}^2}$  represents the molecular relaxivity of the adduct, *i.e.* is two times higher than the average value normalized to 1 mM concentration of Gd(III).  $R_1^{\text{dia}}$  is the diamagnetic contribution measured by replacing the Gd(III) complexes with a diamagnetic analogue.

The concentration of both the unbound complexes can be expressed in terms of the bound species:

$$R_1^{\text{obs}} = r_1^{\text{GdL}^1} (\text{GdL}_T^1 - [\text{Gd}_2\text{L}^1\text{L}^2]) + r_1^{\text{GdL}^2} (\text{GdL}_T^2 - [\text{Gd}_2\text{L}^1\text{L}^2]) + r_1^{\text{Gd}_2\text{L}^1\text{L}^2} [\text{Gd}_2\text{L}^1\text{L}^2] + R_1^{\text{dia}} \quad [2]$$

$$R_1^{\text{obs}} - R_1^{\text{dia}} = r_1^{\text{GdL}^1} [\text{Gd}_2\text{L}^1\text{L}^2] \left( r_1^{\text{Gd}_2\text{L}^1\text{L}^2} - r_1^{\text{GdL}^1} - r_1^{\text{GdL}^2} \right) + r_1^{\text{GdL}^1} \text{GdL}_T^1 + r_1^{\text{GdL}^2} \text{GdL}_T^2 \quad [3]$$

where  $\text{GdL}_T^1$  and  $\text{GdL}_T^2$  represent the total concentration of the two complexes in the aqueous solution.

The concentration of the adduct can be obtained by the expression of the chemical equilibrium:

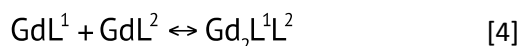

$$K_A = \frac{[Gd_2L^1L^2]}{[GdL^1][GdL^2]} = \frac{[Gd_2L^1L^2]}{[GdL_T^1 - Gd_2L^1L^2][GdL_T^2 - Gd_2L^1L^2]} \quad [5]$$

$$[Gd_2L^1L^2] = \frac{(K_A GdL_T^1 + K_A GdL_T^2 + 1) - \sqrt{(K_A GdL_T^1 + K_A GdL_T^2 + 1)^2 - 4K_A^2 GdL_T^1 GdL_T^2}}{2K_A} \quad [6]$$

The combination between Eqs. 3 and 6 allows the analysis of the relaxation rate dependence on the total concentration of one of the two complexes chosen as independent variable in the titration (*e.g.*  $GdL^2$  in the experiment reported in Fig. 7 left).

**Figure S1.** pH dependence of the longitudinal water proton relaxivity at 20 MHz and 25 °C of GdL<sup>2</sup>

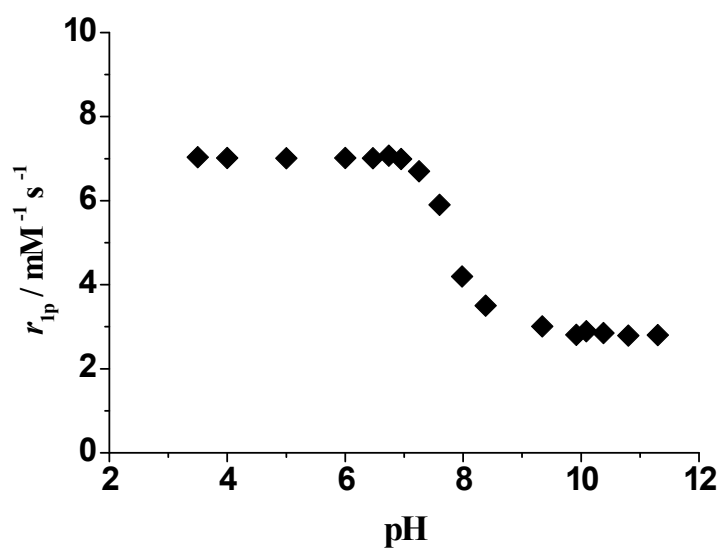

Supplement: c4dt02971b1.pdf [file c4dt02971b1.pdf]
